**Title:**

**Comparative genomics analyses indicate differential methylated amine utilisation trait within the member of the genus *Gemmobacter***

Running title:

Methylated amine utilisation trait in *Gemmobacter*

Eileen Kröber<sup>1</sup>, Lewis Spurgin<sup>2</sup>, Daniela Wischer<sup>3</sup> and Deepak Kumaresan<sup>3#</sup>

<sup>1</sup> Microbial Biogeochemistry, RA Landscape Functioning, ZALF Leibniz Centre for Landscape Research, Müncheberg, Germany

<sup>2</sup> School of Biological Sciences, University of East Anglia, Norwich, UK

<sup>3</sup> School of Biological Sciences & Institute for Global Food Security, Queen's University Belfast, Belfast, Northern Ireland, UK

#Correspondence to

Dr D Kumaresan, School of Biological Sciences, Queen's University Belfast, Belfast, Northern Ireland, United Kingdom

Email: [d.kumaresan@qub.ac.uk](mailto:d.kumaresan@qub.ac.uk)

## Abstract

Methylated amines are ubiquitous in the environment and play a role in regulating the earth's climate via a set of complex biological and chemical reactions. Microbial degradation of these compounds is a major sink. Recently we isolated a facultative methylotroph, *Gemmobacter* sp. LW-1, an isolate from the unique environment Movile Cave, Romania, which is capable of methylated amine utilisation as a carbon source. Here, using a comparative genomics approach, we investigate how widespread methylated amine utilisation trait is within the members of the bacterial genus *Gemmobacter*. Five genomes of different *Gemmobacter* species isolated from diverse environments, such as activated sludge, fresh water, sulphuric cave waters (Movile Cave) and the marine environment were available from public repositories and used for the analysis. Our results indicate that some members of the genus *Gemmobacter*, namely *G. aquatilis*, *G. caeni* and *G. sp. LW-1* have the genetic potential of methylated amine utilisation while others (*G. megaterium* and *G. nectariphilus*) have not. Ancestral state reconstruction analysis also suggested that methylated amine utilisation trait might not be ancestral to members of the genus *Gemmobacter* and has been gained. Based on our analysis, we suggest that the trait of methylated amine utilisation within the members of the genus *Gemmobacter* might be independent of their habitat and more randomly distributed.

## Importance

Methylated amines are an important carbon and/or nitrogen for microorganisms in the environment. Recent advances in DNA sequencing and availability of bacterial genome sequences have allowed us to perform *in silico* experiments to understand and compare genetic potential. Using a comparative genomic approach, we show differential methylated amine utilisation trait within a bacterial genus i.e. *Gemmobacter* and that the trait is independent of the habitat. Ancestral state reconstruction analysis suggests that members

within the genus *Gemmobacter* that can use methylated amines might have gained the trait. Our study also emphasizes the need to use a holistic approach to understand the role of microorganisms in C and N cycling in the environment, rather than methods based on phylogenetic marker genes.

## Introduction

Methylated amines (MAs) are ubiquitous in the environment with a range of natural and anthropogenic sources including the oceans, vegetation, sediments and organic-rich soils, animal husbandry, food industry, pesticides, combustion, sewage, and automobiles, to mention only a few (1-3). Methylated amines are also known to influence earth's climate, via a series of complex biological and chemical interactions (4). Some of the most abundant methylated amines found in the atmosphere are trimethylamine (TMA), dimethylamine (DMA) and monomethylamine (MMA) (1). Microbial metabolism of methylated amines involves aerobic and anaerobic microorganisms, e.g. some methanogenic archaea such as *Methanosarcina* and *Methanomicrobium* can use MAs to produce methane (5-7) while Gram-positive and Gram-negative methylotrophic bacteria can use MAs as carbon and nitrogen source (8). Previously, MAs were typically associated with marine ecosystems as they are by-products of degradation of osmolytic chemicals such as glycine betaine, carnitine, choline and trimethylamine N-oxide (8). However, recent studies have reported the detection and activity of aerobic methylotrophic bacteria that utilize MAs in a variety of natural and anthropogenic environments (1, 9-12) and could play a major role in global C and N budgets.

Aerobic methylotrophs are a polyphyletic group of microorganisms capable of utilizing one-carbon ( $C_1$ ) compounds such as methane, methanol or methylated amines as their sole source of carbon and energy (9, 14, 15). Methylotrophs can degrade TMA to DMA by using the enzymes TMA dehydrogenase, TMA monooxygenase or TMA methyltransferase, encoded by the genes *tdm*, *tmm* and *mtt*, respectively (16-18). The enzymes DMA dehydrogenase (*dmd*) or DMA monooxygenase (*dmmDABC*) modulate the conversion of DMA to MMA (15, 16). Two distinct pathways have been characterised for the oxidation of MMA (10). The direct MMA-oxidation pathway mediated by a single enzyme (MMA dehydrogenase (MMADH) in gram negative bacteria and MMA oxidase in gram positive bacteria) converts MMA to formaldehyde and releases ammonium (19, 20). The alternate pathway, referred to as the *N*-methylglutamate (NMG) pathway or indirect MMA-oxidation pathway, is mediated by three individual enzymes via the oxidation of MMA to gamma-glutamylmethylamide (GMA) and its further degradation to *N*-methylglutamate (NMG) and 5,10-methylenetetrahydrofolate ( $CH_2 = H_4F$ ) (3, 10). A stepwise conversion of MMA in the NMG pathway is modulated by the enzymes GMA synthetase (*gmaS*), NMG synthase (*mgsABC*) and NMG dehydrogenase (*mgdABCD*) (3, 8). The capability to use MMA not only as a source for carbon but also for nitrogen is widespread in bacteria. Notably, the NMG pathway is not only restricted to methylotrophs but also present in non-methylotrophic bacteria that use MMA as a nitrogen but not as a carbon source (16, 21, 22).

In a recent study, we isolated an alphaproteobacterial facultative methylotrophic bacterium, *Gemmobacter* sp. LW-1 (recently renamed from *Catellibacterium* (23)) from the Movile Cave ecosystem (24) (Mangalia, Romania) that can use methylated amines as both carbon and nitrogen source (12) and subsequently obtained its genome sequence (25). Using a  $^{13}C$ -MMA DNA based stable-isotope probing (SIP) experiment we also showed that *Gemmobacter* sp. LW-1 was indeed an active MMA utiliser in microbial mats from this environment (12). This

was the first report of methylated amine utilisation in a member of the bacterial genus *Gemmobacter*. However, growth on C<sub>1</sub> compounds (methanol and formate) has been previously reported for the genus *Gemmobacter*, i.e. for *G. caeni* (26).

The genus *Gemmobacter* (family *Rhodobacteraceae*) currently comprises ten validated species: *Gemmobacter megaterium* (27), *G. nectariphilum* (23, 28), *G. aquatilis* (29), *G. caeni* (23, 26), *G. aquaticus* (23, 30), *G. nanjingense* (23, 31), *G. intermedius* (32), *G. lanyuensis* (33), *G. tilapiae* (34) and *G. fontiphilus* (23). These species were isolated from a wide range of environments including fresh water environments (freshwater pond (29, 34), freshwater spring (23, 33)), coastal planktonic seaweed (27), white stork nestling (32), waste water and activated sludge (26, 28, 31), suggesting that members of the genus *Gemmobacter* are widely distributed in anthropogenic and natural environments.

Here, using a comparative genomics approach we study how widespread methylated amine utilisation trait is within the members of the genus *Gemmobacter*. We used five isolate genomes for members within the genus *Gemmobacter* (*G. sp.* LW-1, *G. caeni*, *G. aquatilis*, *G. nectariphilus* and *G. megaterium*) available from public repositories (Accessed March 2017 and June 2018). These genomes were used for comparative genomics and ancestral state reconstruction analysis to understand patterns of gain/loss of methylated amine utilisation across the *Gemmobacter* phylogeny.

## **Materials and Methods**

### *Genome data acquisition*

Five *Gemmobacter* genomes (*G. caeni*, *G. aquatilis*, *G. nectariphilus*, *G. megaterium*, *Gemmobacter sp.* LW-1) available through the Integrated Microbial Genomes (IMG) database

(<https://img.jgi.doe.gov/>) were used for comparative genome analysis (35). Accession numbers and genome characteristics are listed in Supplementary Table S1.

### *Phylogenetic analysis*

Phylogenetic relatedness between the different members of the genus *Gemmobacter* was determined using phylogenetic trees constructed from 16S rRNA gene sequences (nucleotide) and metabolic gene sequences (*gmaS* and *mauA*; amino acids) involved in MMA utilisation. RNAmmer (36) was used to retrieve 16S rRNA gene sequences from the genome sequences. Multiple sequence alignment of 16S rRNA gene sequences was performed using the SINA alignment service via SILVA (37, 38) and subsequently imported into MEGA7 (39) to construct a neighbour-joining nucleotide-based phylogenetic tree (40). Bootstrap analysis was performed with 1000 replicates to provide confidence estimates for phylogenetic tree topologies (41).

To determine phylogenetic affiliations for the protein encoding genes *gmaS* and *mauA*, gene sequences retrieved from the genome sequences were aligned to homologous sequences retrieved from the NCBI Genbank database using Basic Local Alignment Search Tool (BLAST, blastx) (42) and curated *gmaS* sequences used for primer design in our previous study (12). Amino acid sequences were aligned in MEGA7 (39) using ClustalW (43) and the alignment was subsequently used to construct maximum likelihood phylogenetic trees based on the JTT matrix-based model (44). Bootstrap analysis was performed with 1000 replicates to provide confidence estimates for phylogenetic tree topologies (41).

### *Comparative genomic analyses*

CGView Comparison Tool (CCT) was used to visually compare the genomes within the genus *Gemmobacter* (45). CCT utilizes BLAST to compare the genomes and the BLAST

results are presented in a graphical map (45). Average Nucleotide Identity (ANI) (46) between different genomes was estimated using one-way ANI (best hit) and two-way ANI (reciprocal best hit) based on Goris *et al.* (47). In addition the whole-genome based average nucleotide identity (gANI) and the  $p_r^{\text{intra-species}}$  value were determined for *G. sp.* LW-1 and *G. caeni* (these two genomes revealed the closest ANI) based on Konstantinidis and Tiedje (48) via the Joint Genome Institute (JGI) platform (<https://ani.jgi-psf.org/html/home.php>; Version 0.3, April 2014). In order to determine if two genomes belong to the same species, the computation of empirical probabilities ( $p_r^{\text{intra-species}}$ ) can be calculated as follows,

$$p_r^{\text{intra-species}}[AF = a, ANI = b] = p_r^{\text{intra-species}}[AF = a] * p_r^{\text{intra-species}}[ANI = b|AF = a]$$

AF represents alignment fraction.

Pan-genome analysis including average amino acid identity (AAI) analysis, pan-genome tree construction and determination of core and dispensable genes and singletons (unique genes) was carried out using the Efficient Database framework for comparative Genome Analyses using BLAST score Ratios (EDGAR) platform (49).

In order to compare the genetic potential for methylated amine utilisation within the available *Gemmobacter* genomes, known protein sequences involved in methylated amine utilisation pathways (3, 16) were used as query sequences through the BLAST (blastp) program (42) available within the Rapid Annotation using Subsystem Technology (RAST) server (50). The list of protein queries used is given in Supplementary Table S2.

We examined patterns of gain/loss of methylated amine utilisation along the above 16S rRNA gene phylogeny, by performing ancestral state reconstruction analysis using the phytools package in R (51). We used stochastic character mapping (52) to map presence/absence of methylated amine utilisation, assigning a prior probability of one to species known to utilise

methylated amines, zero to those known not to do so, and 0.5 to those where the trait value was unknown. We used MCMC (with the function *make.simmap*) to simulate 1000 stochastic maps, and then we used the function *densityMap* (53) to visualise the aggregate result from the stochastic mapping analysis.

## Results and discussion

### *Phylogenetic relatedness based on the 16S rRNA and metabolic gene*

The phylogenetic relatedness of the five members within the genus *Gemmobacter* (*G. sp.* LW-1, *G. caeni*, *G. aquatilis*, *G. nectariphilus* and *G. megaterium*) was resolved based on 16S rRNA gene sequences (Figure 1). Three members of the genus *Gemmobacter* (*G. sp.* LW-1, *G. caeni*, and *G. aquatilis*) clustered together with several other related *Gemmobacter* and *Rhodobacter* 16S rRNA gene sequences retrieved from fresh water, soil and sediment and activated sludge environments (Figure 1). *G. nectariphilus* and *G. megaterium* sequences clustered together with *Paracoccus kawasakiensis* and other related *Gemmobacter* sequences from marine, fresh water and activated sludge environments (Figure 1). Based on the 16S rRNA gene sequences retrieved from public database, we observed that the members of the genus *Gemmobacter* are widely distributed in anthropogenic (such as activated sludge and clinical environments) and natural environments i.e. fresh water, soil and sediment, and marine environments (Figure 1).

GMA synthetase, a key enzyme in the NMG pathway, is encoded by the gene *gmaS*. *gmaS* sequences retrieved from the isolate genomes along with other ratified *gmaS* sequences were used to construct an amino acid-based phylogenetic tree (Figure 2). Multiple sequence alignment and construction of a phylogenetic tree based on amino-acid sequences clearly separated *gmaS* from *glnA* gene sequences, a homolog of the *gmaS* gene encoding for the enzyme glutamine synthetase functionally unrelated (Figure 2). *gmaS* gene sequences



retrieved from genomes of *G. sp.* LW-1, *G. caeni* and *G. aquatilis* clustered within Group I of alphaproteobacterial *gmaS* sequences containing sequences from marine and non-marine bacteria within the orders *Rhodobacterales* and *Rhizobiales* as described in Wischer et al. (12) and were closely related to *Paracoccus yeei*, *P. sp.* 1W-5 and *Rhodobacter sp.* 1W-5 (Figure 2).

Whilst *gmaS* gene sequences were detected in three of the five investigated *Gemmobacter* genomes, *mauA* gene sequences were identified only in the genomes of *G. caeni* and *G. sp.* LW-1 (Supplementary Figure S1). It has been suggested that the NMG pathway for MMA utilisation is more universally distributed and more abundant across proteobacterial methylotrophs than the direct MMA oxidation pathway (13) although the NMG pathway is energetically more expensive compared to the energetically favourable direct MMA oxidation pathway (54). In addition, genes encoding for the enzymes within the NMG pathway (*gmaS*) can not only be detected in methylotrophs but also in non-methylotrophic bacteria that use MMA as a nitrogen source, but not as a carbon source (12, 16).

### ***A comparative genome analysis of members within the genus Gemmobacter***

At the time of the analysis, five *Gemmobacter* genomes obtained from isolates from different environments were available (Figure 1 and Table 2). *Gemmobacter* genome sizes range from ~3.96 Mb to ~5.14 Mb with GC contents between 64.71% to 66.19%. Analysis of sequence annotations revealed that on average 91.13% of the genomes consist of coding sequences.

The genomes were compared using the CGView comparison tool (45) was used (Figure 3). *Gemmobacter sp.* LW-1, isolated from the Movile Cave ecosystem was used as the reference genome and the results of the BLAST comparison with other *Gemmobacter* genomes are represented as a BLAST ring for each genome (Figure 3). Similarities between segments of

the reference genome sequence and the other genome sequences are shown by a coloured arc beneath the region of similarity indicating the percentage of similarity as a colour code. Our analysis (Figure 3) revealed low identity levels (mostly <88%) between *Gemmobacter* sp. LW-1 and *G. aquatilis*, *G. nectarophilus* and *G. megaterium* across the genomes. Moreover, the analysis suggested several sites of potential insertion/deletion events in the genome of *Gemmobacter* sp. LW-1. Possible insertion/deletion regions can be identified as those gaps in the map where no homology is detected. For example, the region between 2200-2300 kbp (Figure 3) where a gap can be found in the otherwise contiguous homologous regions between the reference genome *G. sp. LW-1* and the first of the query genomes (*G. caeni*). This might likely be due to a lack of hits or hits with low identity that can be spurious matches. Since it covers a large region we could possibly rule out that it is not an artefact arising from a lack of sensitivity in the BLAST analysis. Instead it could be an insertion or deletion of a large DNA fragment such as a prophage or a genomic island. Even though the genomes of *G. sp. LW-1* and *G. caeni* are closely related, the analysis demonstrates that their genomes are not completely identical. Despite the fact that the majority of their genomes indicate very high identity levels (mostly >96-98% as shown by the dominance of dark red colours of the circle representing the BLAST hit identity between *G. sp. LW-1* and *G. caeni*), many segments appear to be exclusive to *G. sp. LW-1*.

In order to further resolve the similarity between these genomes we calculated the average nucleotide identity (ANI) (46) (Supplementary Table S3 and Supplementary Figure S2A-D) and the average amino acid identity, short AAI (Supplementary Figure S2E). It is generally accepted that an ANI value of >95-96% can be used for species delineation (55-57). Our analysis revealed that *Gemmobacter* sp. LW-1 and *G. caeni* share an ANI value of 98.62 (Supplementary Table S3) implying that both are in fact the same species. The genome-based average nucleotide identity (gANI) between *G. sp. LW-1* and *G. caeni* was calculated as

98.70. The AF was calculated to be 0.91, which would result in a computed probability of 0.98 suggesting that both genomes belong to the same species. However, it should be noted that these are draft genomes and a more in depth characterization of their physiology and phenotype is required to delineate these organisms at the level of strain.

Pan-genome analysis, carried out using the EDGAR platform (49), identified metabolic genes present in all *Gemmobacter* species (core genes), two or more *Gemmobacter* species (accessory or dispensable genes), and unique *Gemmobacter* species (singleton genes). A pan-genome tree was constructed (Figure 4A) based on the pan-genome dataset and neighbor-joining method (40). As with the 16S-based phylogenetic tree (Figure 1), the five *Gemmobacter* species formed two main clusters in the pan-genome tree analysis (Figure 4A). The pan-genome tree also confirmed the evolutionary closeness between *Gemmobacter caeni* and *Gemmobacter* sp. LW-1 (Figure 4A). According to pan-genome analysis of the five *Gemmobacter* genomes, a total of 9,286 genes were identified, consisting of 1,806 core genes, 3085 dispensable genes and 305, 1,072, 896, 1,165 and 957 singletons for *G.* sp. LW-1, *G. caeni*, *G. aquatilis*, *G. nectariphilus* and *G. megaterium*, respectively (Figure 4B). On average 53.3% of singletons were identified as having hypothetical functions (Figure 4C). In addition, the number of singletons did not correlate with the size of the genome, which is in contrast with the correlation between the number of genes and the size of the genome.

### ***Methylated amine utilisation, N assimilation and C<sub>1</sub> oxidation***

Investigation of the methylated amine utilisation pathways in five *Gemmobacter* species revealed the presence of the genes encoding the enzymes TMA dehydrogenase (*tmd*), TMA monooxygenase (*tmm*), TMA methyltransferase (*mttB*), TMAO demethylase (*tdm*) and DMA monooxygenase in genomes of *G.* sp. LW-1, *G. caeni* and *G. aquatilis* while none of these genes were detected in *G. nectariphilus* or *G. megaterium* (Figure 5). These findings are

supported by results from a previous study which showed growth of *G. sp. LW-1* on TMA as a carbon and nitrogen source (12). *G. sp. LW-1*, *G. caeni* and *G. aquatilis* could potentially use the TMA oxidation or demethylation pathway to convert TMA to DMA. Based on the genome sequences, it can be suggested that these three species use the enzyme DMA monooxygenase (*dmmDABC*) to oxidize DMA to MMA but not the DMA dehydrogenase since the corresponding protein encoding gene (*dmd*) was not found (Figure 5).

In order to compare the distribution of the direct MMA-oxidation pathway and the NMG pathway, the genomes of five *Gemmobacter* species were tested for the presence of *mauA* and *gmaS* gene sequences (Figure 5). The direct MMA-oxidation pathway (*mauA*-dependent) is so far only known to be present in methylotrophic bacteria that can use MMA as a carbon source. Whereas the NMG pathway (*gmaS*-dependent) has been shown to be present in non-methylotrophic bacteria that can use MMA as a nitrogen source (12, 13, 21, 54). Analysis of the genome sequences revealed that both *G. sp. LW-1* and *G. caeni* possess genes for both MMA oxidation pathways (Figure 5). We have previously shown that *Gemmobacter sp. LW-1* can use MMA and TMA as both a carbon and nitrogen source (12). Genome sequence of *G. aquatilis* indicated the presence of genes involved only in the NMG pathway. In the facultative methylotroph *Methylobacterium extorquens* AM1 it has been shown that the NMG pathway is advantageous compared to the direct MMA-oxidation pathway (54). Particularly under limiting MMA concentrations (<1 mM) the energetically expensive NMG pathway plays a key role during growth with MMA as a sole nitrogen source. NMG pathway enables facultative methylotrophic bacteria to switch between using MMA as a nitrogen source or as a carbon and energy source whereas the direct MMA oxidation pathway allows for rapid growth on MMA only as the primary energy and carbon source (54). This could suggest that *G. aquatilis* might use the NMG pathway for utilizing MMA as both nitrogen and carbon source. However, growth assays are required to confirm whether *G. aquatilis* can use MMA

as a carbon source. We did not detect genes for either MMA oxidation pathways (*mauA*- and *gmaS*-dependent) in the genome sequences of *G. nectariphilus* and *G. megaterium* suggesting the lack of genetic potential of these organisms to use MMA as either C or N source.

*Gemmobacter* sp. LW-1 was isolated from the Movile Cave ecosystem (12). Microbial mats and lake water within the cave have been shown to harbor a wide diversity of methylated amine-utilizing bacteria (12, 58). Whilst the mechanism of MAs production within the system has to be elucidated, it can be speculated that degradation of floating microbial mats (i.e. organic matter) could result in MAs (12). Similarly, *G. caeni* isolated from activated sludge (26) could possibly use the MAs generated from organic matter degradation. Interestingly, whilst *G. megaterium* was isolated from a marine environment (seaweed (27)) possibly encountering MAs from the degradation of osmolytes such as glycine betaine (*N,N,N*-trimethylglycine) we did not detect metabolic genes involved in methylated amine utilisation. Our analysis suggest that the trait for methylated amine utilisation could be independent of the habitat.

The C<sub>1</sub> units derived from methylated amines need to be further oxidized when the nitrogen is sequestered without assimilation of the carbon from the methylated amines. Genome analysis confirmed that all five *Gemmobacter* species possess the genetic capability for C<sub>1</sub> oxidation and also indicate that tetrahydrofolate (H<sub>4</sub>F) is the C<sub>1</sub> carrier (Figure 5). The bifunctional enzyme 5,10-methylene-tetrahydrofolate dehydrogenase/ cyclohydrolase, encoded by the gene *fold*, was detected in all the *Gemmobacter* genomes (Figure 5/ Table 1). Genes encoding key enzymes in the C<sub>1</sub> oxidation pathway via tetrahydromethanopterin (H<sub>4</sub>MPT) were not detected. (10). The formate-tetrahydrofolate ligase, encoded by the gene *fhs* (Figure 5), provides C<sub>1</sub> units for biosynthetic pathways (16). However, the oxidation of formyl-H<sub>4</sub>F (CHO-H<sub>4</sub>F) can also be facilitated by *purU*, the gene encoding for the formyl-H<sub>4</sub>F

deformylase. The formate dehydrogenase (*fdh*) mediates the last step of the C<sub>1</sub> oxidation pathway, the oxidation of formate to CO<sub>2</sub>. The genes for the C<sub>1</sub> oxidation pathway via H<sub>4</sub>F were detected in all five *Gemmobacter* genomes.

The *xoxF* gene, encoding the lanthanide-dependent methanol dehydrogenase (59-61) and the *mxoF* gene, encoding the alpha subunit of the calcium-dependent methanol dehydrogenase (62), are responsible for the oxidation of methanol to formaldehyde (63, 64) and were both detected in genomes of *G. sp.* LW-1, *G. caeni* and *G. aquatilis* but not in *G. nectarophilus* and *G. megaterium* (Figure 5/ Table 1). The lanthanide-dependent methanol dehydrogenase is thought to be more widespread in bacterial genomes (65). The *fae* gene, encoding the formaldehyde-activating enzyme that catalyses the reduction of formaldehyde with H<sub>4</sub>MPT was not detected in any of the five *Gemmobacter* genomes confirming that these members of the genus *Gemmobacter* lack the H<sub>4</sub>MPT pathway for formaldehyde oxidation (Figure 5/ Table 1). However, in all the *Gemmobacter* genomes we detected genes encoding the glutathione (GSH)-dependent formaldehyde oxidation pathway, including the genes *adhI* / *flhA* and *fghA* coding for the GSH-dependent formaldehyde dehydrogenase and the S-formyl-GSH hydrolase, respectively (Figure 5 and Table 1). Reduction of formaldehyde with GSH can be mediated by the GSH-dependent formaldehyde-activating enzyme, encoded by the gene *gfa* (66). A Gfa-like protein was detected in the genomes of *G. sp.* LW-1, *G. caeni*, *G. nectarophilus* and *G. megaterium* but not in *G. aquatilis*. This could perhaps indicate a non-essential role of Gfa in formaldehyde oxidation as suggested by Chen (16) and Wilson *et al.* (67). Investigation of the nitrogen assimilation pathway revealed the presence of the genes encoding glutamine synthetase (GS; *gluL*) and glutamine synthase (GOGAT; *glxB*) in all five *Gemmobacter* genomes. In bacteria this pathway is essential for glutamate synthesis at low ammonium concentrations (16).

Using comparative genome analysis we provide genome-based evidence that the two *Gemmobacter* isolates *G. sp. LW-1* and *G. caeni* are capable of generating energy from complete oxidation of methylated amines via the H<sub>4</sub>F-dependent pathway using either the energetically expensive NMG pathway or the energetically favourable direct MMA oxidation pathway. *Gemmobacter aquatilis* is genetically capable of methylated amine degradation to yield formaldehyde and only encodes the genes for the energetically expensive NMG pathway, which indicates that *G. aquatilis* could use this pathway to use MMA as a nitrogen source. Both *G. nectariphilus* and *G. megaterium* genomes indicate the lack of potential to use methylated amines (Figure 5/Table 1).

### ***Evolution of methylated amine utilisation in Gemmobacter***

Three of the five investigated *Gemmobacter* species are genetically capable of methylated amine utilisation, of which two (*G. sp. LW-1* and *G. caeni*) possess the genes for both MMA utilisation pathways, whereas in the genome of *G. aquatilis* we detected only genes involved in the indirect MMA oxidation pathway (NMG pathway). The two other *Gemmobacter* species (*G. megaterium* and *G. nectariphilus*) do not possess the genes for methylated amine utilisation. Therefore, the question arises if the genes for methylated amine utilisation have been acquired or lost during evolution.

Stochastic character mapping along the 16S rRNA gene phylogeny suggested that the ability to use methylated amines has either been gained or lost multiple times (Supplementary Figure S3). Most likely is that methylated amine utilisation is not ancestral in *Gemmobacter*, and has evolved three times, once in the clade containing *G. sp. LW-1*, *G. caeni* and *G. aquatilis*, once in *Haematobacter* and once in *Paracoccus* (Supplementary Figure S3). An alternative, but less plausible, scenario is that methylated amine utilisation is an ancestral trait in *Gemmobacter*, and has been lost and regained multiple times across the phylogeny.

## Conclusions

Three of the five investigated *Gemmobacter* genomes (*G. sp.* LW-1, *G. caeni* and *G. aquatilis*) indicated metabolic potential to utilize methylated amines, of which only two (*G. sp.* LW-1 and *G. caeni*) possess the genes for both the MMA oxidation pathways, the energetically expensive NMG pathway and the energetically favourable direct MMA oxidation pathway. *G. sp.* LW-1 and *G. caeni* are facultative methylotrophs which could potentially use these pathways to utilize MMA as both a carbon and nitrogen source, while potentially *G. aquatilis* could only use the NMG pathway as a nitrogen source. Furthermore, the genomes of *G. sp.* LW-1 and *G. caeni* showed a high similarity to each other (>98%) suggesting that both belong to the same species. *G. megaterium* and *G. nectariphilus* genomes indicated no metabolic potential to utilize MAs. Phylogenetic analysis (16S tree, Figure 1), pan-genome and ANI analysis revealed that *G. sp.* LW-1 and *G. caeni* are closely related, although they were isolated from different environments. Whilst *G. caeni* and *G. nectariphilus* were isolated from a similar environment (activated sludge) it revealed a high amount of evolutionary change from the common ancestor. Overall, these results suggest that the trait for methylated amine utilisation could be independent from the habitat and localised factors could influence the ability of these organisms to use methylated amines. Access to *Gemmobacter* isolates with or without the genetic potential for methylated amine utilisation trait will allow us to perform physiological experiments in future to test how this trait can affect fitness of closely related organisms. Ancestral state reconstruction analysis confirms that across *Gemmobacter* and related genera, methylated amine utilisation has either evolved or been lost multiple times over the evolutionary history of this group. The adaptive or non-adaptive processes behind this pattern remain to be investigated.



## **Conflict of Interest**

The authors declare no conflict of interest.

## **Acknowledgements**

We thank Dr Felipe Hernandes Coutinho (Federal University of Rio de Janeiro) for a fruitful discussion on genomic regions of insertion and deletion in *Gemmobacter* sp. LW-1. The EDGAR platform is financially supported by the BMBF grant FKZ 031A533 within the de.NBI network.

## REFERENCES

1. Ge X, Wexler AS, Clegg SL. 2011. Atmospheric amines – Part I. A review. *Atmospheric Environment* 45:524-546.
2. Schade GW, Crutzen PJ. 1995. Emission of aliphatic-amines from animal husbandry and their reactions - Potential source of N<sup>2</sup>O and Hcn. *Journal of Atmospheric Chemistry* 22:319-346.
3. Latypova E, Yang S, Wang YS, Wang T, Chavkin TA, Hackett M, Schäfer H, Kalyuzhnaya MG. 2010. Genetics of the glutamate-mediated methylamine utilisation pathway in the facultative methylotrophic beta-proteobacterium *Methyloversatilis universalis* FAM5. *Molecular microbiology* 75:426-439.
4. Carpenter LJ, Archer SD, Beale R. 2012. Ocean-atmosphere trace gas exchange. *Chemical Society Reviews* 41:6473-6506.
5. Lyimo TJ, Pol A, Jetten MSM, Op den Camp HJM. 2009. Diversity of methanogenic archaea in a mangrove sediment and isolation of a new *Methanococcoides* strain. *Fems Microbiology Letters* 291:247-253.
6. Burke SA, Lo SL, Krzycki JA. 1998. Clustered genes encoding the methyltransferases of methanogenesis from monomethylamine. *Journal of Bacteriology* 180:3432-3440.
7. Liu Y, Whitman WB. 2008. Metabolic, phylogenetic, and ecological diversity of the methanogenic archaea. *Ann N Y Acad Sci* 1125:171-89.
8. Chen Y, Scanlan J, Song L, Crombie A, Rahman MT, Schäfer H, Murrell JC. 2010.  $\gamma$ -Glutamylmethylamide is an essential intermediate in the metabolism of methylamine by *Methylocella silvestris*. *Applied and Environmental Microbiology* 76:4530-4537.
9. Chistoserdova L, Kalyuzhnaya MG, Lidstrom ME. 2009. The expanding world of methylotrophic metabolism. *Annual Review of Microbiology* 63:477-499.
10. Chistoserdova L. 2011. Modularity of methylotrophy, revisited. *Environmental Microbiology* 13:2603-2622.
11. Chen Y, Wu L, Boden R, Hillebrand A, Kumaresan D, Moussard H, Baciú M, Lu Y, Colin Murrell J. 2009. Life without light: microbial diversity and evidence of sulfur- and ammonium-based chemolithotrophy in Movile Cave. *ISME J* 3:1093-1104.
12. Wischer D, Kumaresan D, Johnston A, El Khawand M, Stephenson J, Hillebrand-Voiculescu AM, Chen Y, Colin Murrell J. 2015. Bacterial metabolism of methylated amines and identification of novel methylotrophs in Movile Cave. *ISME J* 9:195-206.
13. Nayak DD, Marx CJ. 2015. Experimental horizontal gene transfer of methylamine dehydrogenase mimics prevalent exchange in nature and overcomes the methylamine growth constraints posed by the sub-optimal N-Methylglutamate pathway. *Microorganisms* 3:60-79.
14. Anthony C. 1982. *The biochemistry of methylotrophs*. Academic Press, London.
15. Lidstrom ME. 2006. Aerobic Methylotrophic Prokaryotes, p 618-634. *In* Dworkin M, Falkow S, Rosenberg E, Schleifer K-H, Stackebrandt E (ed), *The Prokaryotes: Volume 2: Ecophysiology and Biochemistry* doi:10.1007/0-387-30742-7\_20. Springer New York, New York, NY.
16. Chen Y. 2012. Comparative genomics of methylated amine utilisation by marine *Roseobacter* clade bacteria and development of functional gene markers (*tmm*, *gmaS*). *Environmental Microbiology* 14:2308-2322.
17. Lidbury I, Murrell JC, Chen Y. 2014. Trimethylamine N-oxide metabolism by abundant marine heterotrophic bacteria. *Proceedings of the National Academy of Sciences* 111:2710-2715.
18. Paul L, Ferguson DJ, Krzycki JA. 2000. The trimethylamine methyltransferase gene and multiple dimethylamine methyltransferase genes of *Methanosarcina barkeri*

- contain in-frame and read-through amber codons. *Journal of Bacteriology* 182:2520-2529.
19. McIntire WS, Wemmer DE, Chistoserdova A, Lidstrom ME. 1991. A new cofactor in a prokaryotic enzyme: tryptophan tryptophylquinone as the redox prosthetic group in methylamine dehydrogenase. *Science* 252:817-824.
  20. Chistoserdova AY, Chistoserdova LV, McIntire WS, Lidstrom ME. 1994. Genetic organization of the *mau* gene cluster in *Methylobacterium extorquens* AM1: complete nucleotide sequence and generation and characteristics of *mau* mutants. *J Bacteriol* 176:4052-4065.
  21. Chen Y, McAleer KL, Murrell JC. 2010. Monomethylamine as a nitrogen source for a nonmethylotrophic bacterium, *Agrobacterium tumefaciens*. *Applied and Environmental Microbiology* 76:4102-4104.
  22. Taubert M, Grob C, Howat AM, Burns OJ, Pratscher J, Jehmlich N, von Bergen M, Richnow HH, Chen Y, Murrell JC. 2017. Methylamine as a nitrogen source for microorganisms from a coastal marine environment. *Environmental Microbiology* 19:2246-2257.
  23. Chen WM, Cho NT, Huang WC, Young CC, Sheu SY. 2013. Description of *Gemmobacter fontiphilus* sp. nov., isolated from a freshwater spring, reclassification of *Catellibacterium nectariphilum* as *Gemmobacter nectariphilus* comb. nov., *Catellibacterium changlense* as *Gemmobacter changlensis* comb. nov., *Catellibacterium aquatile* as *Gemmobacter aquaticus* nom. nov., *Catellibacterium caeni* as *Gemmobacter caeni* comb. nov., *Catellibacterium nanjingense* as *Gemmobacter nanjingensis* comb. nov., and emended description of the genus *Gemmobacter* and of *Gemmobacter aquatilis*. *International Journal of Systematic and Evolutionary Microbiology* 63:470-478.
  24. Kumaresan D, Wischer D, Stephenson J, Hillebrand-Voiculescu A, Murrell JC. 2014. Microbiology of Movile Cave - A chemolithoautotrophic ecosystem. *Geomicrobiology Journal* 31:186-193.
  25. Kumaresan D, Wischer D, Hillebrand-Voiculescu AM, Murrell JC. 2015. Draft genome sequences of facultative methylotrophs, *Gemmobacter* sp. strain LW1 and *Mesorhizobium* sp. strain 1M-11, isolated from Movile Cave, Romania. *Genome Announc* 3.
  26. Zheng J-W, Chen Y-G, Zhang J, Ni Y-Y, Li W-J, He J, Li S-P. 2011. Description of *Catellibacterium caeni* sp. nov., reclassification of *Rhodobacter changlensis* Anil Kumar et al. 2007 as *Catellibacterium changlense* comb. nov. and emended description of the genus *Catellibacterium*. *International Journal of Systematic and Evolutionary Microbiology* 61:1921-1926.
  27. Liu J-J, Zhang X-Q, Chi F-T, Pan J, Sun C, Wu M. 2014. *Gemmobacter megaterium* sp. nov., isolated from coastal planktonic seaweeds. *International Journal of Systematic and Evolutionary Microbiology* 64:66-71.
  28. Tanaka Y, Hanada S, Manome A, Tsuchida T, Kurane R, Nakamura K, Kamagata Y. 2004. *Catellibacterium nectariphilum* gen. nov., sp. nov., which requires a diffusible compound from a strain related to the genus *Sphingomonas* for vigorous growth. *International Journal of Systematic and Evolutionary Microbiology* 54:955-959.
  29. Rothe B, Fischer A, Hirsch P, Sittig M, Stackebrandt E. 1987. The phylogenetic position of the budding bacteria *Blastobacter aggregatus* and *Gemmobacter aquatilis* gen., nov. sp. nov. *Archives of Microbiology* 147:92-99.
  30. Liu Y, Xu C-J, Jiang J-T, Liu Y-H, Song X-F, Li H, Liu Z-P. 2010. *Catellibacterium aquatile* sp. nov., isolated from fresh water, and emended description of the genus *Catellibacterium* Tanaka et al. 2004. *International Journal of Systematic and Evolutionary Microbiology* 60:2027-2031.

31. Zhang J, Chen S-A, Zheng J-W, Cai S, Hang B-J, He J, Li S-P. 2012. *Catellibacterium nanjingense* sp. nov., a propanil-degrading bacterium isolated from activated sludge, and emended description of the genus *Catellibacterium*. *International Journal of Systematic and Evolutionary Microbiology* 62:495-499.
32. Kämpfer P, Jerzak L, Wilharm G, Golke J, Busse H-J, Glaeser SP. 2015. *Gemmobacter intermedius* sp. nov., isolated from a white stork (*Ciconia ciconia*). *International Journal of Systematic and Evolutionary Microbiology* 65:778-783.
33. Sheu S-Y, Shiau Y-W, Wei Y-T, Chen W-M. 2013. *Gemmobacter lanyuensis* sp. nov., isolated from a freshwater spring. *International Journal of Systematic and Evolutionary Microbiology* 63:4039-4045.
34. Sheu S-Y, Sheu D-S, Sheu F-S, Chen W-M. 2013. *Gemmobacter tilapiae* sp. nov., a poly- $\beta$ -hydroxybutyrate-accumulating bacterium isolated from a freshwater pond. *International Journal of Systematic and Evolutionary Microbiology* 63:1550-1556.
35. Markowitz VM, Chen I-MA, Palaniappan K, Chu K, Szeto E, Pillay M, Ratner A, Huang J, Woyke T, Huntemann M. 2013. IMG 4 version of the integrated microbial genomes comparative analysis system. *Nucleic acids research* 42:D560-D567.
36. Lagesen K, Hallin P, Rødland EA, Stærfeldt H-H, Rognes T, Ussery DW. 2007. RNAmmer: consistent and rapid annotation of ribosomal RNA genes. *Nucleic acids research* 35:3100-3108.
37. Pruesse E, Peplies J, Glöckner FO. 2012. SINA: accurate high-throughput multiple sequence alignment of ribosomal RNA genes. *Bioinformatics* 28:1823-1829.
38. Pruesse E, Quast C, Knittel K, Fuchs BM, Ludwig W, Peplies J, Glöckner FO. 2007. SILVA: a comprehensive online resource for quality checked and aligned ribosomal RNA sequence data compatible with ARB. *Nucleic acids research* 35:7188-7196.
39. Kumar S, Stecher G, Tamura K. 2016. MEGA7: Molecular Evolutionary Genetics Analysis version 7.0 for bigger datasets. *Molecular biology and evolution* 33:1870-1874.
40. Saitou N, Nei M. 1987. The neighbor-joining method: a new method for reconstructing phylogenetic trees. *Molecular biology and evolution* 4:406-425.
41. Felsenstein J. 1985. Confidence limits on phylogenies: an approach using the bootstrap. *Evolution* 39:783-791.
42. Altschul SF, Gish W, Miller W, Myers EW, Lipman DJ. 1990. Basic local alignment search tool. *Journal of molecular biology* 215:403-410.
43. Thompson JD, Higgins DG, Gibson TJ. 1994. CLUSTAL W: improving the sensitivity of progressive multiple sequence alignment through sequence weighting, position-specific gap penalties and weight matrix choice. *Nucleic acids research* 22:4673-4680.
44. Jones DT, Taylor WR, Thornton JM. 1992. The rapid generation of mutation data matrices from protein sequences. *Bioinformatics* 8:275-282.
45. Grant JR, Arantes AS, Stothard P. 2012. Comparing thousands of circular genomes using the CGView Comparison Tool. *BMC genomics* 13:202.
46. Rodriguez-R LM, Konstantinidis KT. 2016. The enveomics collection: a toolbox for specialized analyses of microbial genomes and metagenomes. *PeerJ Preprints*.
47. Goris J, Konstantinidis KT, Klappenbach JA, Coenye T, Vandamme P, Tiedje JM. 2007. DNA-DNA hybridization values and their relationship to whole-genome sequence similarities. *International journal of systematic and evolutionary microbiology* 57:81-91.
48. Konstantinidis KT, Tiedje JM. 2005. Genomic insights that advance the species definition for prokaryotes. *Proceedings of the National Academy of Sciences of the United States of America* 102:2567-2572.

49. Blom J, Kreis J, Spanig S, Juhre T, Bertelli C, Ernst C, Goesmann A. 2016. EDGAR 2.0: an enhanced software platform for comparative gene content analyses. *Nucleic Acids Research* 44:W22-W28.
50. Aziz RK, Bartels D, Best AA, DeJongh M, Disz T, Edwards RA, Formsma K, Gerdes S, Glass EM, Kubal M. 2008. The RAST Server: rapid annotations using subsystems technology. *BMC genomics* 9:75.
51. Revell LJ. 2012. phytools: an R package for phylogenetic comparative biology (and other things). *Methods in Ecology and Evolution* 3:217-223.
52. Nielsen R. 2002. Mapping mutations on phylogenies. *Systematic biology* 51:729-739.
53. Revell LJ. 2013. Two new graphical methods for mapping trait evolution on phylogenies. *Methods in Ecology and Evolution* 4:754-759.
54. Nayak DD, Agashe D, Lee M-C, Marx CJ. 2016. Selection maintains apparently degenerate metabolic pathways due to tradeoffs in using methylamine for carbon versus nitrogen. *Current Biology* 26:1-11.
55. Goris J, Konstantinidis KT, Klappenbach JA, Coenye T, Vandamme P, Tiedje JM. 2007. DNA-DNA hybridization values and their relationship to whole-genome sequence similarities. *Int J Syst Evol Microbiol* 57:81-91.
56. Richter M, Rossello-Mora R. 2009. Shifting the genomic gold standard for the prokaryotic species definition. *Proc Natl Acad Sci U S A* 106:19126-19131.
57. Kim M, Oh H-S, Park S-C, Chun J. 2014. Towards a taxonomic coherence between average nucleotide identity and 16S gene sequence similarity for species demarcation of prokaryotes. *International Journal of Systematic and Evolutionary Microbiology* 64:346-351.
58. Kumaresan D, Stephenson J, Doxey AC, Bandukwala H, Brooks E, Hillebrand-Voiculescu A, Whiteley AS, Murrell JC. 2018. Aerobic proteobacterial methylotrophs in Movile Cave: genomic and metagenomic analyses. *Microbiome* 6.
59. Hibi Y, Asai K, Arafuka H, Hamajima M, Iwama T, Kawai K. 2011. Molecular structure of La<sup>3+</sup>-induced methanol dehydrogenase-like protein in *Methylobacterium radiotolerans*. *Journal of Bioscience and Bioengineering* 111:547-549.
60. Nakagawa T, Mitsui R, Tani A, Sasa K, Tashiro S, Iwama T, Hayakawa T, Kawai K. 2012. A catalytic role of XoxF1 as La<sup>3+</sup>-dependent methanol dehydrogenase in *Methylobacterium extorquens* strain AM1. *Plos One* 7.
61. Pol A, Barends TRM, Dietl A, Khadem AF, Eygensteyn J, Jetten MSM, Op den Camp HJM. 2014. Rare earth metals are essential for methanotrophic life in volcanic mudpots. *Environmental Microbiology* 16:255-264.
62. Williams PA, Coates L, Mohammed F, Gill R, Erskine PT, Coker A, Wood SP, Anthony C, Cooper JB. 2005. The atomic resolution structure of methanol dehydrogenase from *Methylobacterium extorquens*. *Acta Crystallographica Section D-Biological Crystallography* 61:75-79.
63. Harms N, Ras J, Koning S, Reijnders WNM, Stouthamer AH, Spanning RGM. 1996. Genetics of C1 metabolism regulation in *Paracoccus denitrificans*, p 126-132. In Lidstrom ME, Tabita FR (ed), *Microbial growth on C(1) compounds*. Kluwer Academic Publishers, Dordrecht, the Netherlands.
64. Christoserdova L, Lidstrom ME. 1997. Molecular and mutational analysis of a DNA region separating two methylotrophy gene clusters in *Methylobacterium extorquens* AM1. *Microbiology* 143:1729-1736.
65. Lv H, Sahin N, Tani A. 2018. Draft genome and description of *Novimethylophilus kurashikiensis* gen. nov. sp. nov., a new lanthanide-dependent methylotrophic species of *Methylophilaceae*. *Environmental Microbiology* doi:10.1111/1462-2920.14062.
66. Goenrich M, Bartoschek S, Hagemeyer CH, Griesinger C, Vorholt JA. 2002. A glutathione-dependent formaldehyde-activating enzyme (Gfa) from *Paracoccus*

- denitrificans* detected and purified via two-dimensional proton exchange NMR spectroscopy. J Biol Chem 277:3069-3072.
67. Wilson SM, Gleisten MP, Donohue TJ. 2008. Identification of proteins involved in formaldehyde metabolism by *Rhodobacter sphaeroides*. Microbiology 154:296-305.

## Figures and Tables

**Figure 1. Phylogenetic tree based on 16S rRNA gene sequences.** Star represents the *Gemmobacter* species used for comparative genome analysis. The tree was constructed using the neighbour-joining method for clustering and the maximum composition likelihood method for computing evolutionary distances. Numbers at branches are bootstrap percentages >50% of 1000 replicates. Coloured boxes represent the habitat where the sequence was retrieved: blue (fresh water), orange (soil and sediment), green (activated sludge), grey (marine), purple (clinical source). Triangles represent sequences that are listed as *Catellibacterium* in the NCBI database, which have been recently reclassified to *Gemmobacter* (23). Scale bar: 0.02 substitutions per nucleotide position.

**Figure 2. Maximum-likelihood phylogenetic tree based on *gmaS* gene sequences.**

Members of the genus *Gemmobacter* used for genome comparison are represented with a star. Amino acid sequences (GmaS) were aligned using the ClustalW algorithm. The tree was constructed using the maximum-likelihood method based on the JTT matrix-based model. Numbers at branches are bootstrap percentages >50% of 1000 replicates. Amino acid sequences of the glutamine synthetase type III (GlnA) were used as out-group. Scale bar: 0.1 substitutions per amino acid position. MRC, marine *Roseobacter* clade.

**Figure 3. DNA BLAST map of *Gemmobacter* genomes.** *Gemmobacter* sp. LW-1 was used as a reference genome against *Gemmobacter megaterium* (inner ring), *Gemmobacter aquatilis* (second inner ring), *Gemmobacter nectariphilus* (third ring), and *Gemmobacter caeni* (fourth ring). The fifth and sixth ring (outer rings) represent the CDS (blue), tRNA (maroon), and rRNA (purple) on the reverse and forward strand, respectively. The color scale (inset) shows the level of sequence identity with the respective sequences from *G. megaterium*, *G. aquatilis*,

*G. nectariphilus* and *G. caeni*. The locations of genes involved in methylotrophy are indicated at the outside of the map.

**Figure 4. Pan-genome analysis of Gemmobacters.** (A) Pan-genome tree consisting of five *Gemmobacter* species was constructed using the neighbour-joining method within the EDGAR platform. (B) Number of core, dispensable, and specific genes (singletons) of each *Gemmobacter* species. (C) Proportion of hypothetical and uncharacterized proteins in the core, dispensable and singleton genome of five *Gemmobacter* species.

**Figure 5. Metabolic pathways involved in methylated amine utilisation and one-carbon utilisation annotated with presence/absence of specific genes in the genomes of *Gemmobacter*.** The analysis was based on a five-way comparison among *Gemmobacter* sp. LW-1 (L), *Gemmobacter caeni* (C), *Gemmobacter aquatilis* (A), *Gemmobacter nectariphilus* (N) and *Gemmobacter megaterium* (M). The color-coded boxes next to the genes indicate the presence (green) or absence (orange) of a gene in each genome. Yellow, gfa-like

**Table 1. Comparative genomic analysis of methylated amine-utilizing genes in genomes-sequenced *Gemmobacters* in comparison to selected marine *Roseobacter* clade bacteria.** Shown is the presence (+) or absence (-) of specific genes in the genome sequences.

**Supplementary Figure S1. Maximum-likelihood phylogenetic tree (JTT matrix-based) of *mauA* sequences.** Sequences from the genus *Gemmobacter* are marked with a star. Amino acid sequences (MauA) were aligned using the ClustalW algorithm. Numbers at branches are bootstrap percentages >50% of 1000 replicates. Scale bar: 0.1 substitutions per amino acid. Coloured boxes indicate *Alphaproteobacteria* (yellow), *Gammaproteobacteria* (red) and *Betaproteobacteria* (black).



**Supplementary Figure S2. (A-D) Average nucleotide identity (ANI) analysis of *Gemmobacter* sp. LW-1 and *Gemmobacter caeni*, *Gemmobacter aquatilis*, *Gemmobacter nectariphilus* and *Gemmobacter megaterium* and (E) AAI analysis between those species**

**Supplementary Figure S3. Ancestral state reconstruction of methylated amine utilisation along the 16S rRNA gene phylogeny, using stochastic mapping.** Branch colour represents the posterior probability (computed as the relative frequency across stochastic maps) of methylated amine utilisation through the phylogeny. Red indicates a high posterior probability of methylated amine utilisation. Star represents the *Gemmobacter* species used for comparative genome analysis.

**Supplementary Table S1. Genome characteristics of the five *Gemmobacter* isolate genomes used in this study.**

**Supplementary Table S2. List of protein queries used for the genome comparison with their accession number.**

**Supplementary Table S3. Average nucleotide identity (ANI) values between *Gemmobacter* sp. LW-1 and *Gemmobacter caeni*, *Gemmobacter aquatilis*, *Gemmobacter nectariphilus*, *Gemmobacter megaterium*, *Rhodobacter sphaeroides* and *Paracoccus denitrificans***

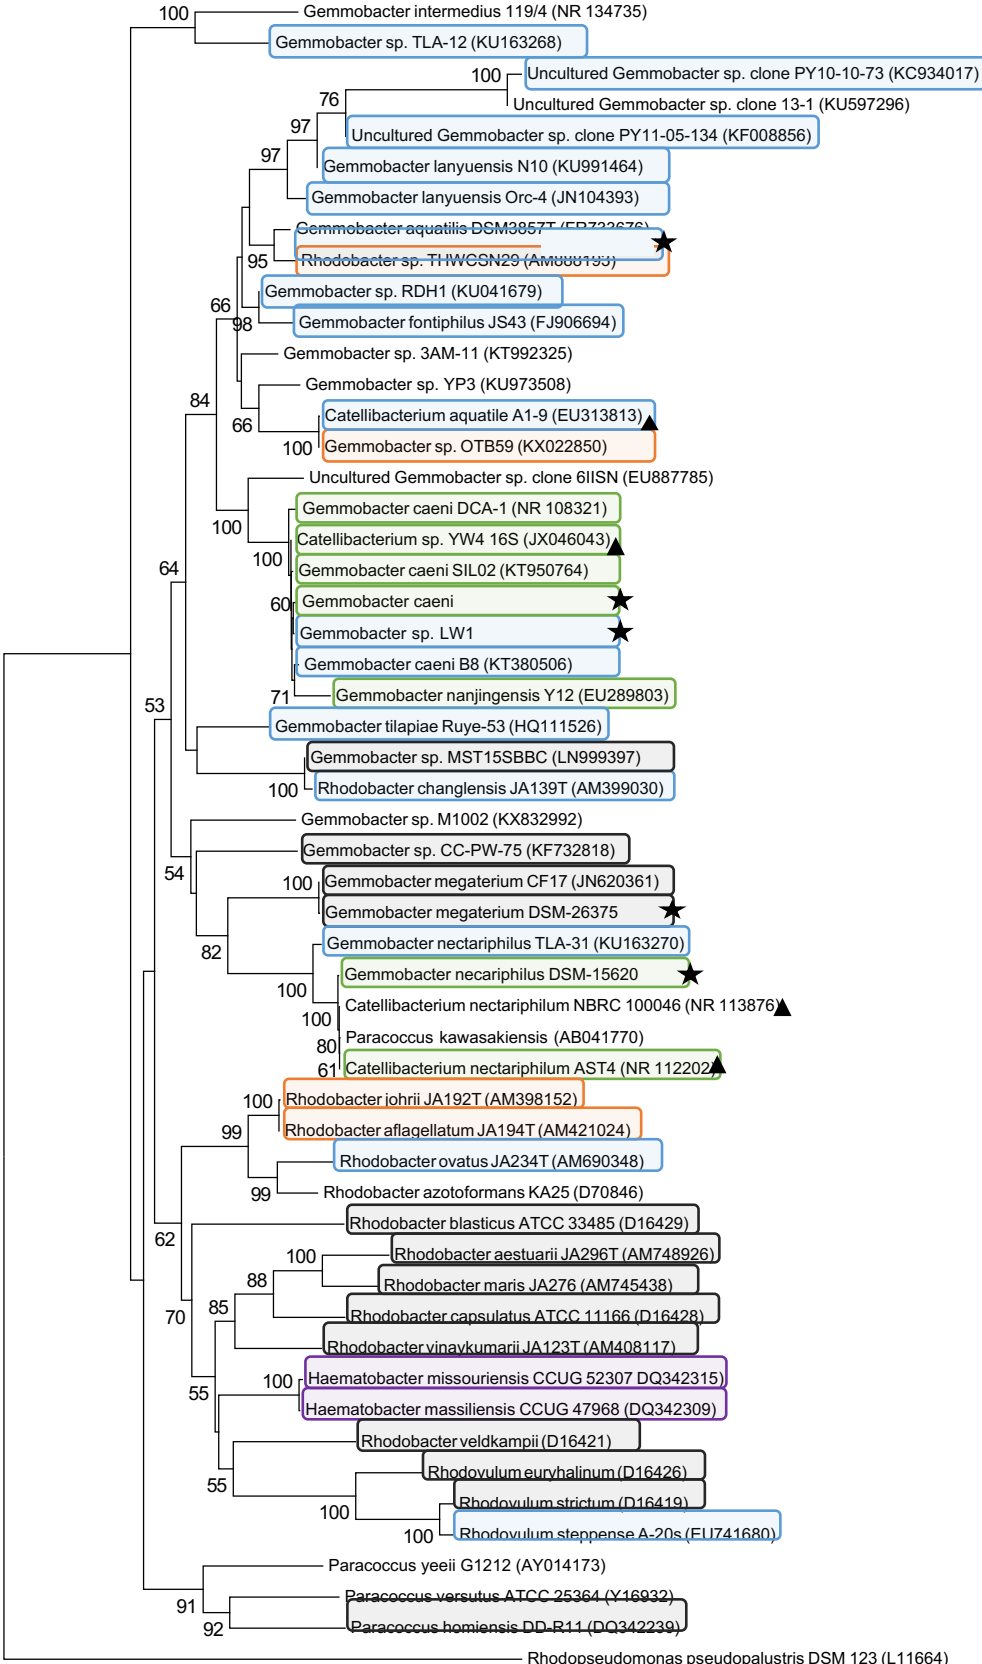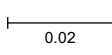

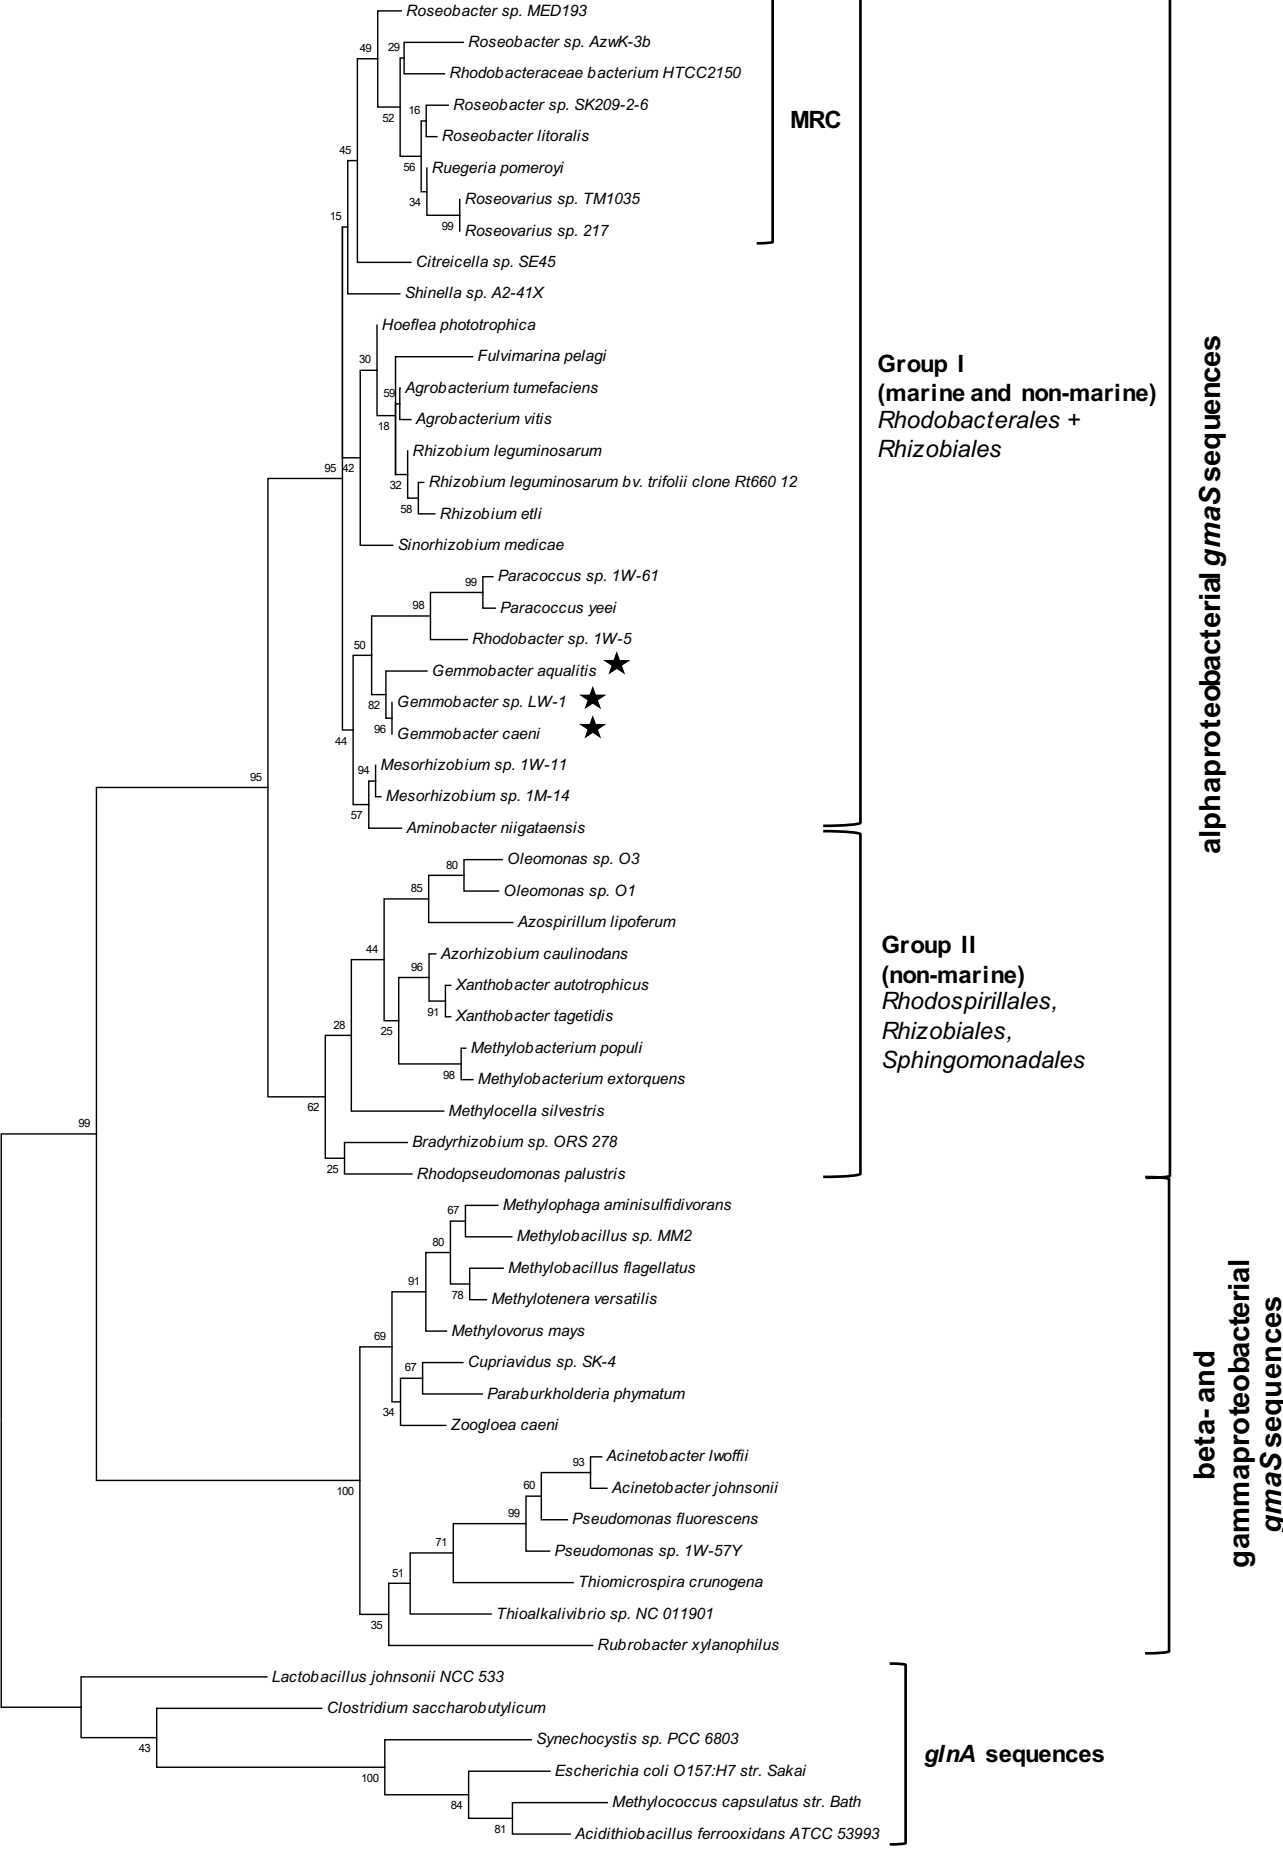

0,1

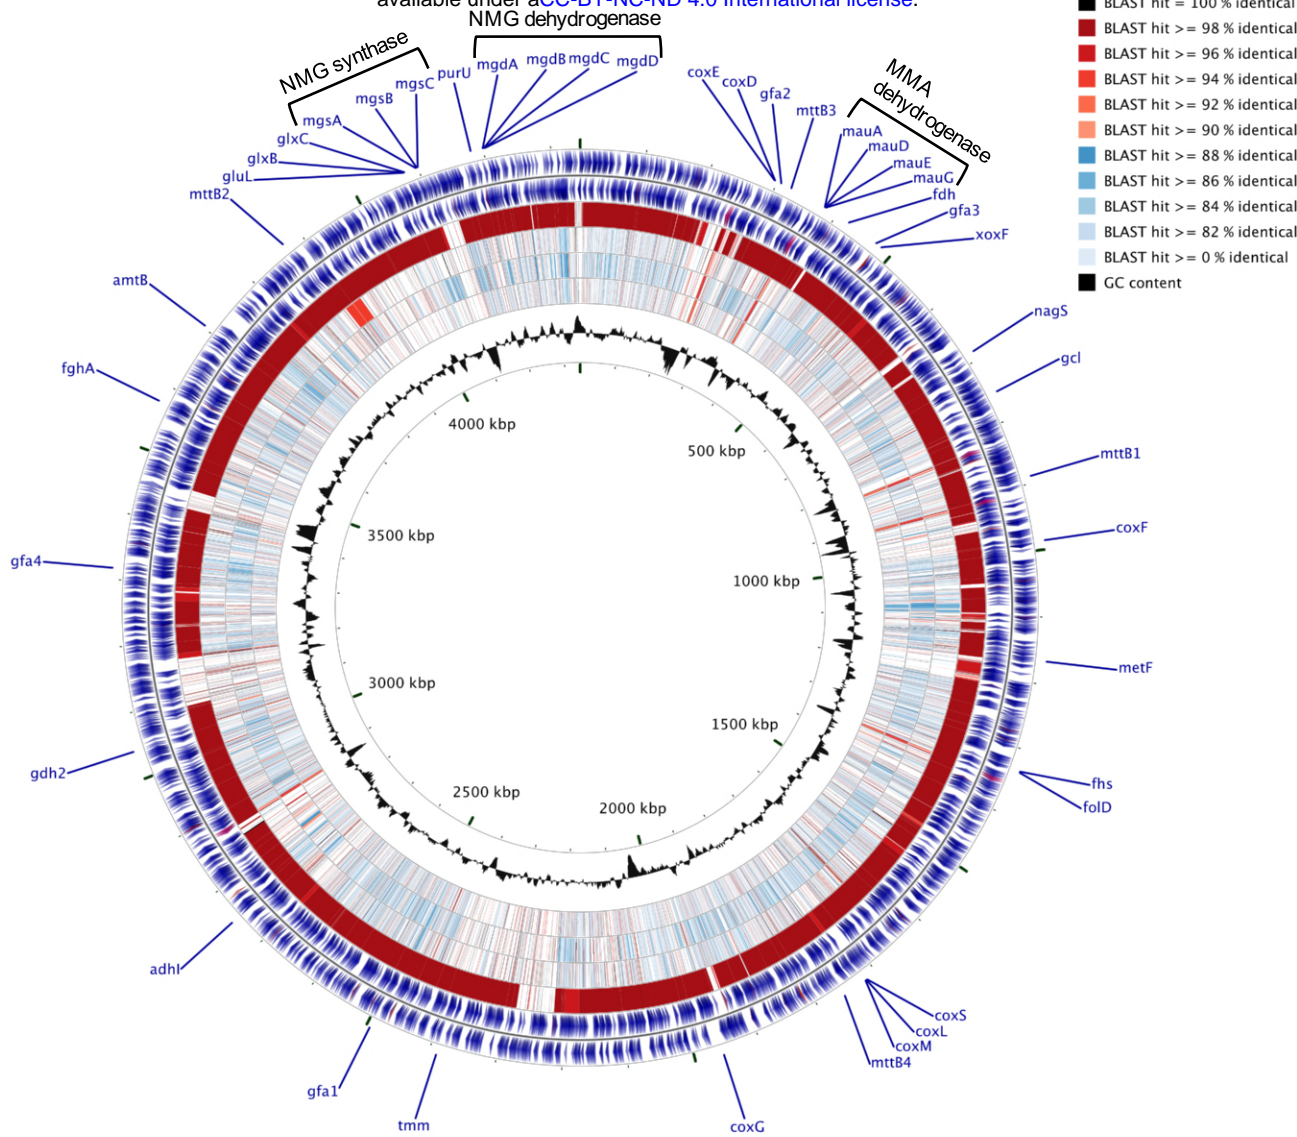

| Protein                                                  | Corresponding gene(s)                    |
|----------------------------------------------------------|------------------------------------------|
| TMA monooxygenase                                        | tmm                                      |
| TMA methyltransferase                                    | mttB1, mttB2, mttB3, mttB4               |
| MMA dehydrogenase                                        | mauA, mauD, mauE, mauG                   |
| NMG synthase                                             | mgsA, mgsB, mgsC                         |
| NMG dehydrogenase                                        | mgdA, mgdB, mgdC, mgdD                   |
| HCHO-activating enzyme                                   | gfa1, gfa2, gfa3, gfa4                   |
| GSH-dependent HCHO dehydrogenase                         | adhI                                     |
| S-formyl-GSH hydrolase                                   | fghA                                     |
| Glutamine synthetase (GS)                                | gluL                                     |
| Glutamate synthase (GOGAT)                               | glxB, glxC                               |
| Methylene-H <sub>4</sub> F-dehydro-genase/cyclohydrolase | folD                                     |
| Formate-H <sub>4</sub> F ligase                          | fhs                                      |
| Formyl-H <sub>4</sub> F deformylase                      | purU                                     |
| Formate dehydrogenase                                    | fdh                                      |
| Carbon monoxide dehydrogenase                            | coxD, coxE, coxF, coxG, coxL, coxM, coxS |
| Methanol dehydrogenase                                   | xoxF                                     |
| N-acetylglutamate synthase                               | nagS                                     |
| Gamma-glutamylcysteine synthetase                        | gcl                                      |
| Methylenetetrahydrofolate reductase                      | metF                                     |
| Glutamate dehydrogenase                                  | gdh2                                     |
| Ammonium transporter                                     | amtB                                     |

A

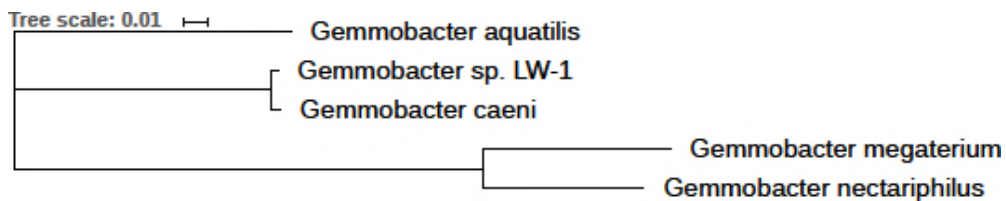

B

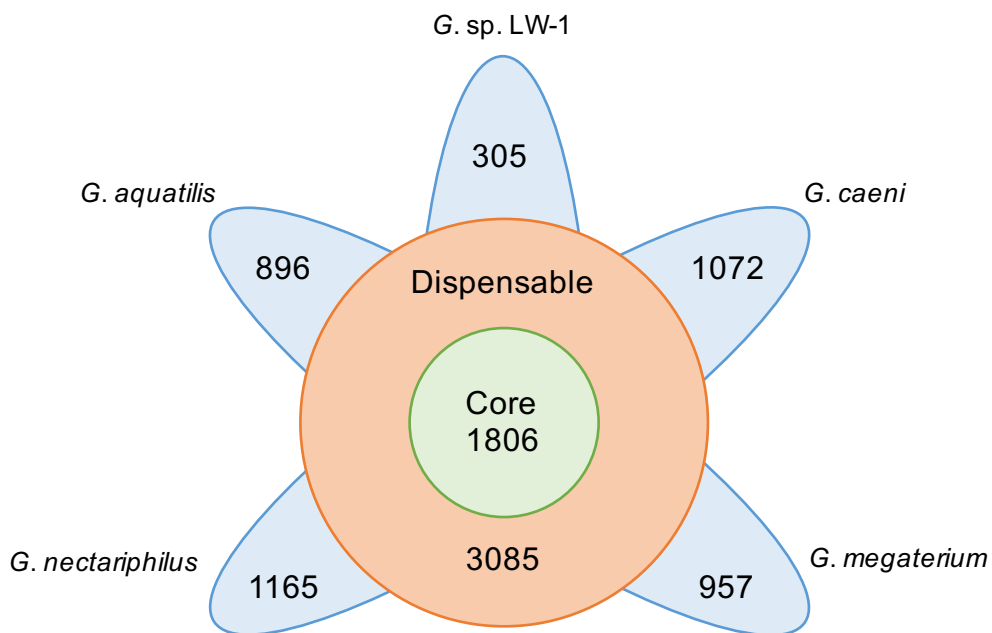

C

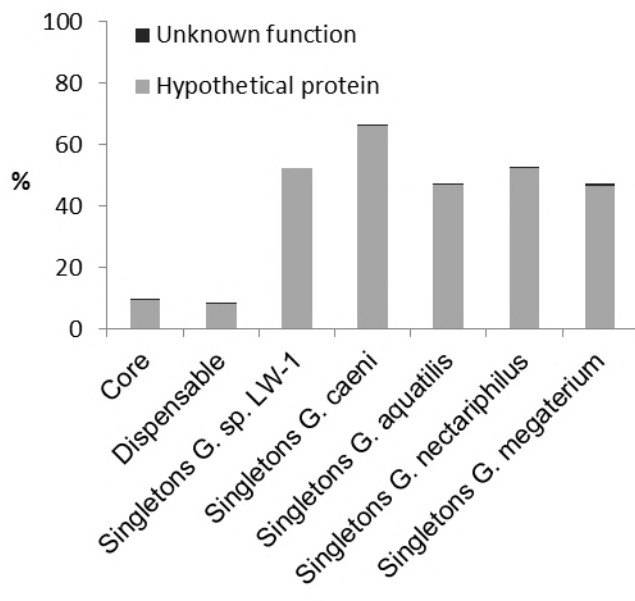

## TMA oxidation

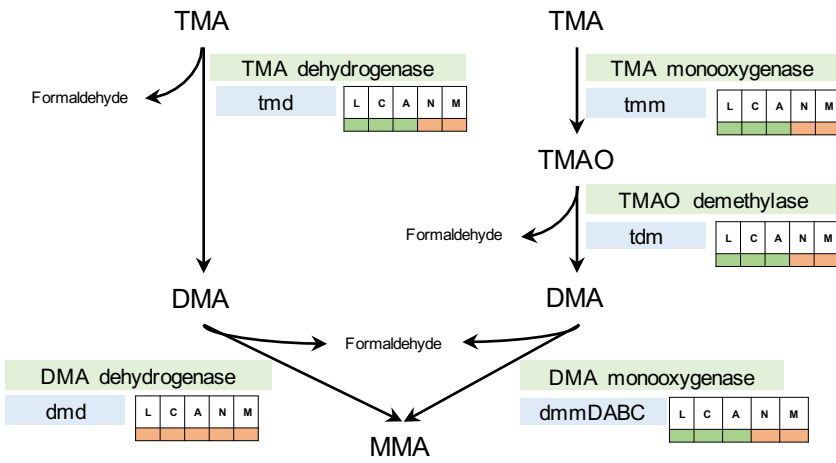

## TMA demethylation

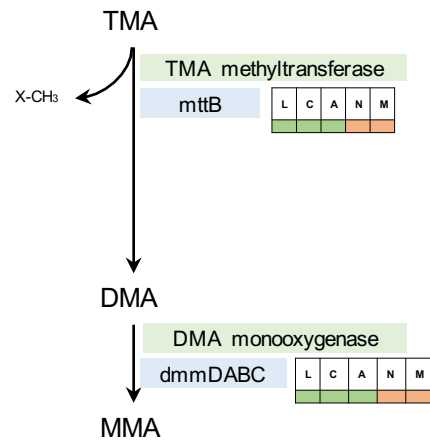

## Direct MMA oxidation pathway

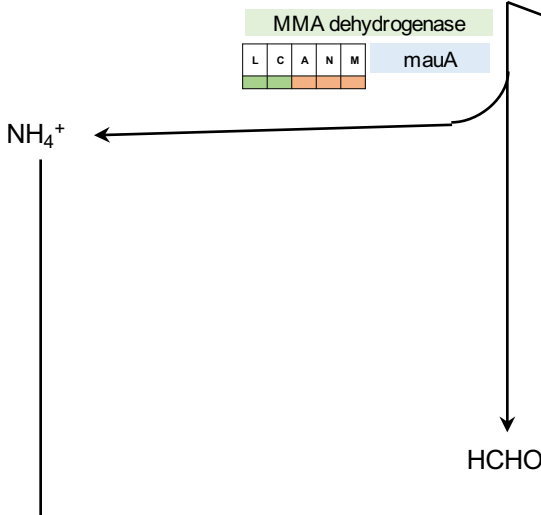

## Indirect MMA oxidation pathway

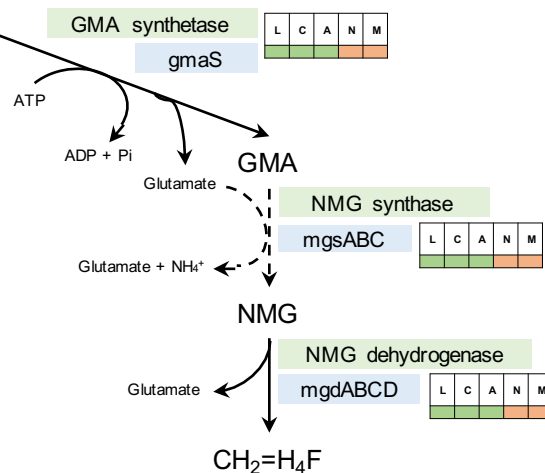

## Nitrogen assimilation pathways

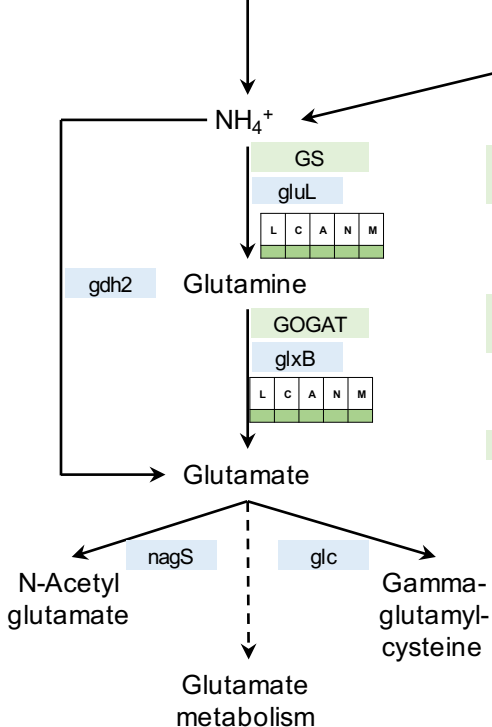

## C<sub>1</sub> oxidation pathways in methylated amine metabolism

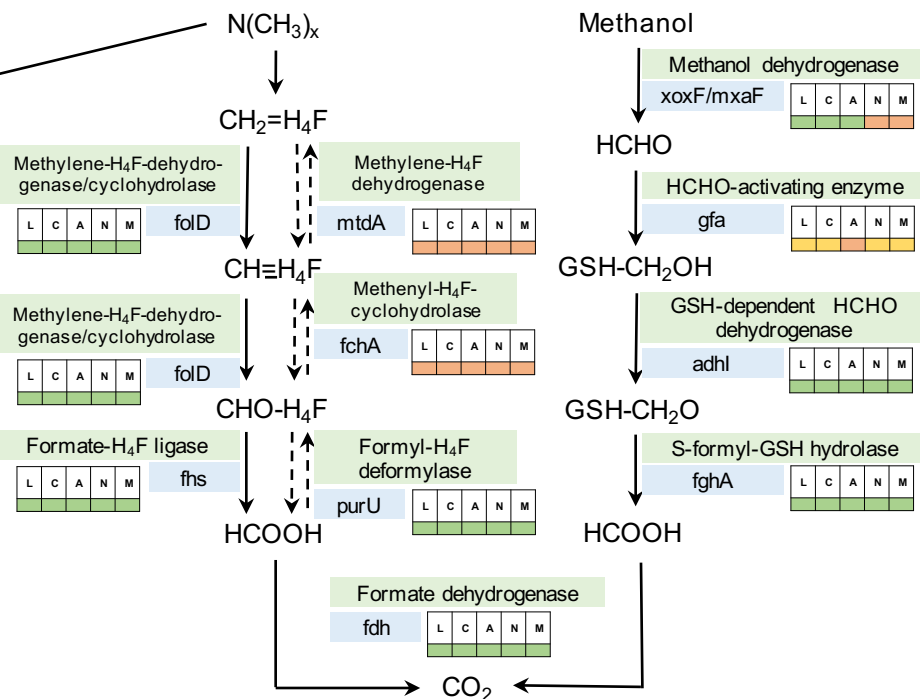

| Organism                                      | <i>gmaS</i> | <i>tmm</i> | <i>xoxF</i> | <i>fae</i> | <i>foldD</i> | <i>purU</i> | <i>fhs</i><br>( <i>ftfL</i> ) | <i>gfa</i> | <i>adhI</i><br>( <i>flhA</i> ) | <i>fghA</i> | <i>fdh</i> | <i>amtB</i> | <i>mtdA/</i><br><i>mtdB</i> | <i>mchA</i> | <i>ftr</i> | <i>fmdA</i><br>/B/C | <i>mauA</i> | <i>cox</i> |
|-----------------------------------------------|-------------|------------|-------------|------------|--------------|-------------|-------------------------------|------------|--------------------------------|-------------|------------|-------------|-----------------------------|-------------|------------|---------------------|-------------|------------|
| <i>Citricella</i> sp. SE45                    | +           | +          | +           | -          | +            | +           | +                             | +          | +                              | +           | +          | +           | -/-                         | -           | -          | -                   | -           | +          |
| <i>Roseovarius</i> sp. TM1035                 | +           | +          | +           | -          | +            | -           | +                             | -          | +                              | +           | +          | +           | -/-                         | -           | -          | -                   | -           | +          |
| <i>Paracoccus denitrificans</i> PD1222        | -           | -          | +           | -          | +            | +           | +                             | +          | +                              | +           | +          | +           | -/-                         | -           | -          | -                   | -           | -          |
| <i>Rhodobacter sphaeroides</i> 241            | -           | +          | +           | -          | +            | +           | +                             | +          | +                              | +           | +          | +           | -/-                         | -           | -          | -                   | -           | +          |
| <i>Gemmobacter caeni</i>                      | +           | +          | +           | -          | +            | +           | +                             | +a         | +                              | +           | +          | +           | -/-                         | -           | -          | -                   | +           | +          |
| <i>Gemmobacter</i> sp. LW-1                   | +           | +          | +           | -          | +            | +           | +                             | +a         | +                              | +           | +          | +           | -/-                         | -           | -          | -                   | +           | +          |
| <i>Gemmobacter aquatilis</i>                  | +           | +          | +           | -          | +            | +           | +                             | -          | +                              | +           | +          | +           | -/-                         | -           | -          | -                   | -           | +          |
| <i>Gemmobacter nectariphilus</i><br>DSM-15620 | -           | -          | -           | -          | +            | +           | +                             | +a         | +                              | +           | +          | +           | -/-                         | -           | -          | -                   | -           | +          |
| <i>Gemmobacter megaterium</i><br>DSM-26375    | -           | -          | -           | -          | +            | +           | +                             | +a         | +                              | +           | +          | +           | -/-                         | -           | -          | -                   | -           | +          |

<sup>a</sup> *gfa*-like protein-encoding gene

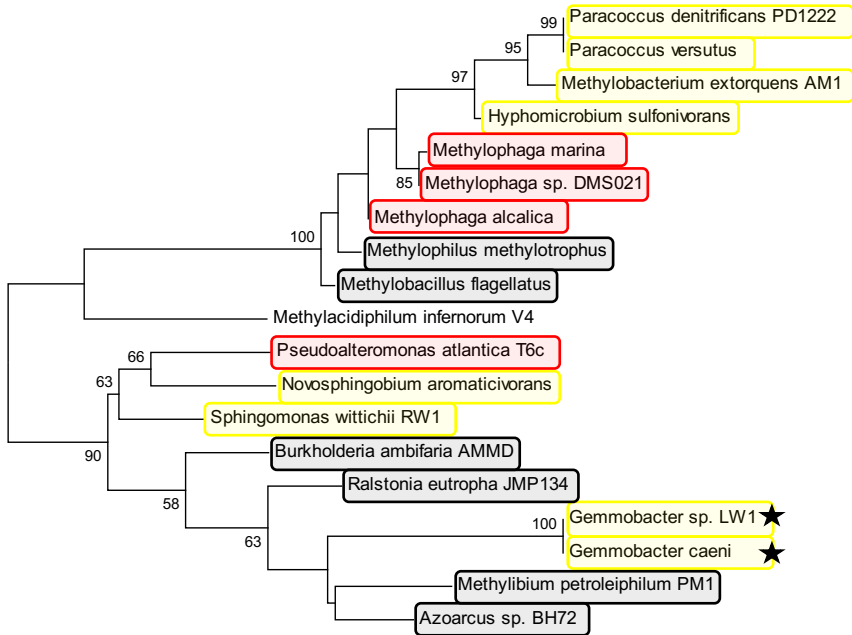

0.1



A) *G. sp. LW1* versus *G. caeni*

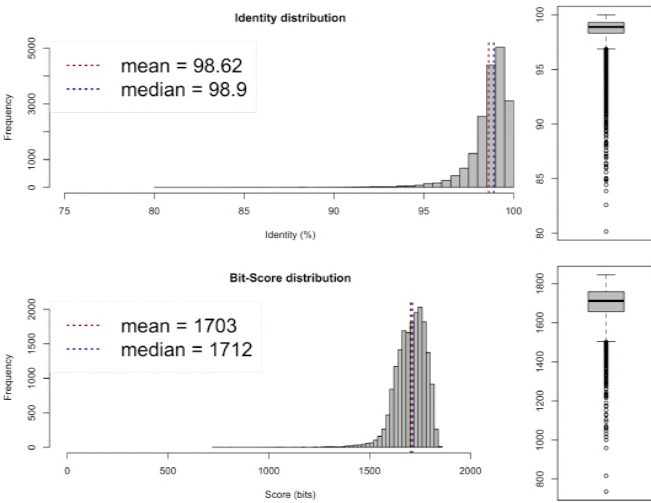

B) *G. sp. LW1* versus *G. aquatilis*

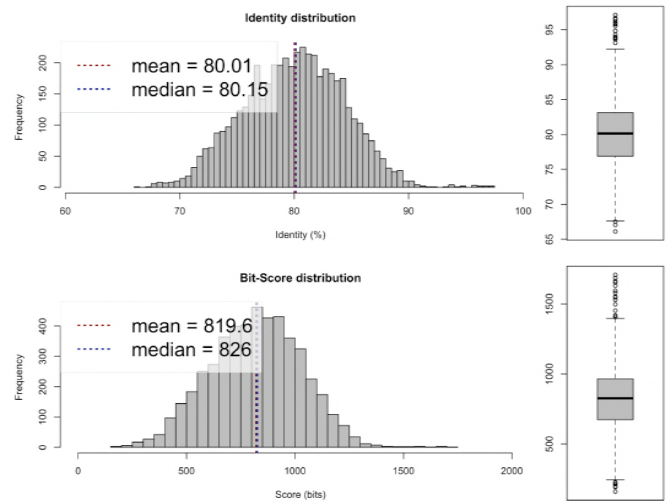

C) *G. sp. LW1* versus *G. nectariphilus*

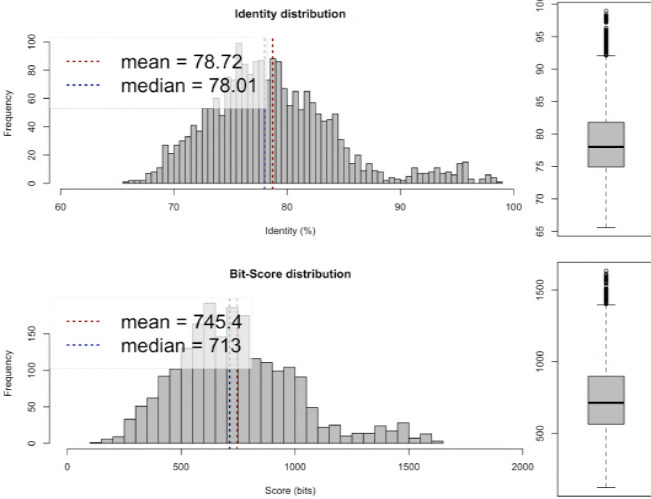

D) *G. sp. LW1* versus *G. megaterium*

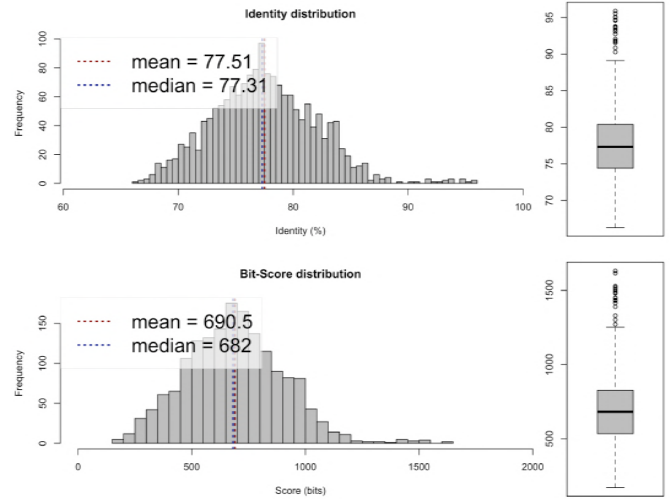

E) AAI analysis

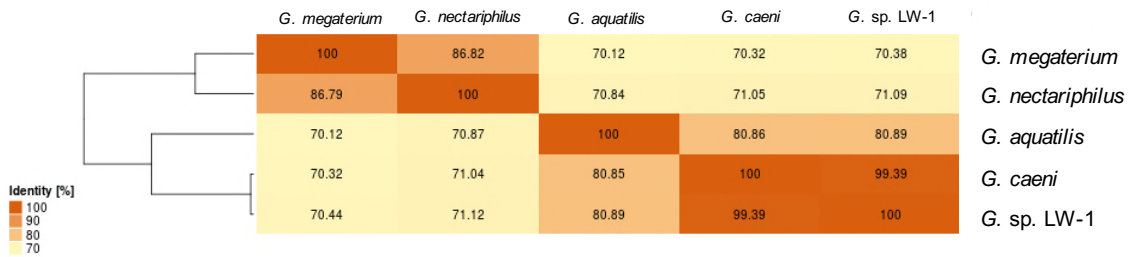

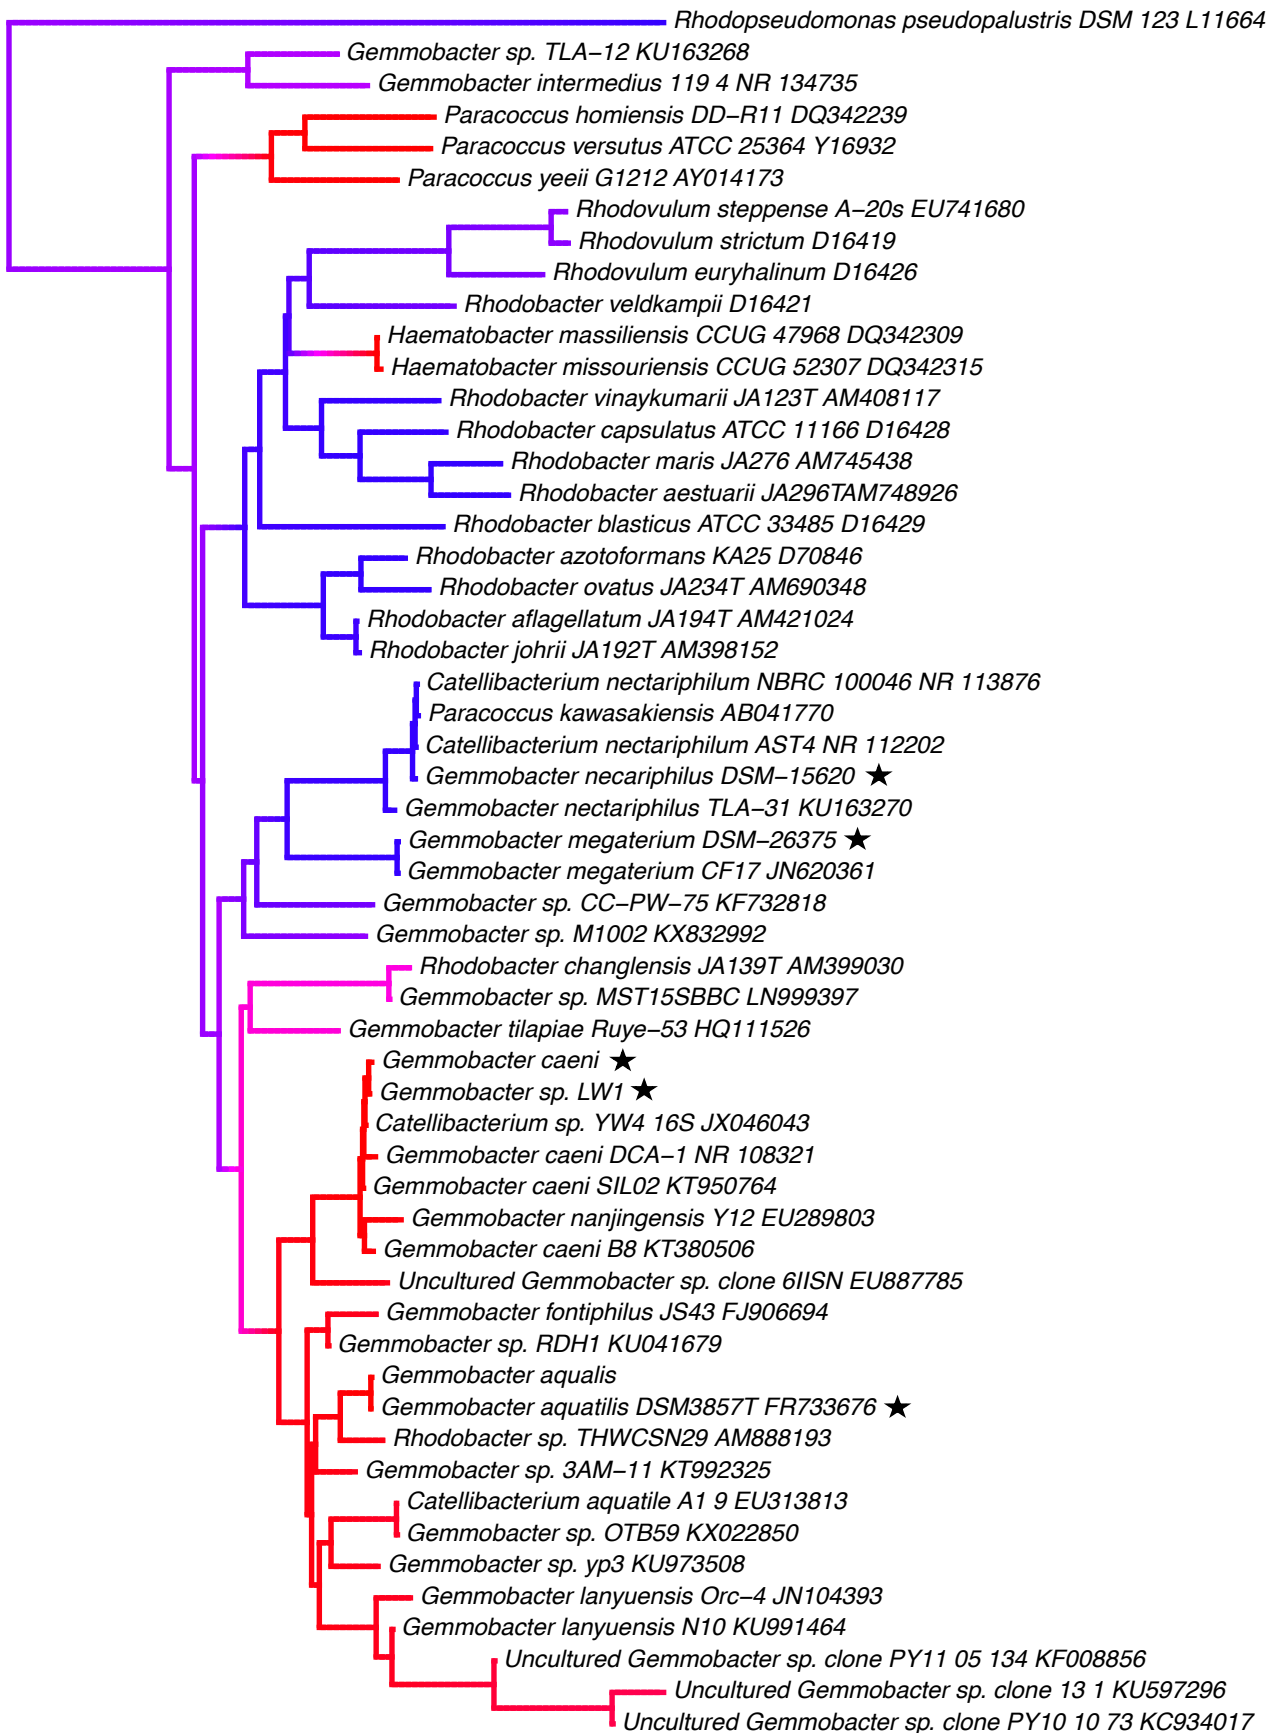

0 PP(state=Present) 1  
length=0.054

| <b>Organism</b>         | <b>Isolation</b> | <b>IMG genome ID</b> | <b>Genome size (Number of total bases)</b> | <b>Gene count (Number of total genes)</b> | <b>CDS count (Number of CDS genes)</b> | <b>rRNA count (Number of rRNA genes)</b> | <b>Protein coding genes with function prediction</b> | <b>Protein coding genes without function prediction</b> |
|-------------------------|------------------|----------------------|--------------------------------------------|-------------------------------------------|----------------------------------------|------------------------------------------|------------------------------------------------------|---------------------------------------------------------|
| <i>G. sp. LW-1</i>      | Mobile Cave      | 2648501906           | 4,344,434                                  | 4,312                                     | 4,223                                  | 18                                       | 3,443                                                | 780                                                     |
| <i>G. caeni</i>         | Activated Sludge | 2739367660           | 5,135,347                                  | 5,228                                     | 5,122                                  | 3                                        | 3,856                                                | 1,266                                                   |
| <i>G. aquatilis</i>     | Aquatic Pond     | 2615840721           | 3,964,038                                  | 3,918                                     | 3,856                                  | 5                                        | 3,105                                                | 751                                                     |
| <i>G. nectariphilus</i> | Activated Sludge | 2524614723           | 4,523,636                                  | 4,462                                     | 4,405                                  | 5                                        | 3,394                                                | 1,011                                                   |
| <i>G. megaterium</i>    | Seaweed          | 2681813556           | 4,168,088                                  | 4,075                                     | 4,020                                  | 3                                        | 3,273                                                | 747                                                     |

| <b>Protein</b>                                                 | <b>Short name</b>         | <b>Accession number (NCBI)</b>                            |
|----------------------------------------------------------------|---------------------------|-----------------------------------------------------------|
| Ammonium transporter                                           | AmtB                      | WP_054302626                                              |
| Carbon monoxide dehydrogenase                                  | Cox                       | KRS16390                                                  |
| DMA dehydrogenase                                              | Dmd                       | S57961                                                    |
| DMA monooxygenase                                              | DmmD, DmmA,<br>DmmB, DMMC | WP_011047316, WP_044028112,<br>WP_011047318, WP_011047319 |
| Formaldehyde-activating enzyme                                 | Fae                       | KGJ23184                                                  |
| Formate dehydrogenase                                          | Fdh                       | WP_054303846                                              |
| Formyl-H <sub>4</sub> F deformylase                            | PurU                      | WP_028029509                                              |
| Formyl-H <sub>4</sub> F synthetase                             | Fhs/FtfL                  | Q83WS0                                                    |
| Formylmethanofuran dehydrogenase                               | FmdA, FmdB, FmdC          | CAF30065, CAF30067, CAF30066                              |
| Formylmethanofuran-H <sub>4</sub> MPT-N-formyltransferase      | Ftr                       | AKJ40646                                                  |
| Glutamine synthetase                                           | GluL                      | WP_054301068                                              |
| Glutamine:2-oxoglutarate aminotransferase (glutamate synthase) | GlxB                      | EHP89794                                                  |
| Glutathione-dependent formaldehyde dehydrogenase               | AdhI/FlhA                 | YP_352634                                                 |
| GMA synthetase                                                 | GmaS                      | KM083625                                                  |
| GSH-dependent formaldehyde-activating enzyme                   | Gfa                       | WP_011746365                                              |
| Methanol dehydrogenase-like protein                            | XoxF                      | ACS40517                                                  |
| Methanol dehydrogenase subunit 1                               | MxaF                      | P16027                                                    |
| Methenyl-H <sub>4</sub> F cyclohydrolase                       | FchA                      | Q49135                                                    |
| Methenyl-H <sub>4</sub> MPT cyclohydrolase                     | MchA                      | Q8KMJ5                                                    |
| Methylene-H <sub>4</sub> F dehydrogenase                       | MtdA                      | CAD13312                                                  |
| Methylene-H <sub>4</sub> F dehydrogenase/ cyclohydrolase       | FoID                      | KNX40634                                                  |
| Methylene-H <sub>4</sub> MTP dehydrogenase                     | MtdB                      | CAD13313                                                  |
| MMA dehydrogenase large subunit                                | MauG                      | WP_082401055                                              |
| MMA dehydrogenase small subunit                                | MauA                      | AAF03760                                                  |
| N-methyl-glutamate dehydrogenase                               | MgdA                      | EPX83758                                                  |
| N-methyl-glutamate synthase                                    | MgsA, MgsB, MgsC          | KGM86398, KGM86397, KGM86396                              |
| S-formyl-glutathione hydrolase                                 | FghA                      | YP_001967351                                              |
| TMA dehydrogenase                                              | Tmd                       | ABG35545                                                  |
| TMA methyltransferase                                          | MttB                      | O93658                                                    |
| TMA monooxygenase                                              | Tmm                       | AAV94838                                                  |
| TMAO demethylase                                               | Tdm                       | ACK52488                                                  |

|                                        | <i>G. sp.</i> LW-1 | <i>G. caeni</i> | <i>G. aquatilis</i> | <i>G. nectariphilus</i> | <i>G. megaterium</i> | <i>Rhodobacter sphaeroides</i> | <i>Paracoccus denitrificans</i> |
|----------------------------------------|--------------------|-----------------|---------------------|-------------------------|----------------------|--------------------------------|---------------------------------|
| <b><i>G. sp.</i> LW-1</b>              |                    | 98.62           | 80.01               | 78.72                   | 77.51                | 77.91                          | 77.67                           |
| <b><i>G. caeni</i></b>                 | 98.62              |                 | 80.04               | 79.77                   | 77.74                | 77.81                          | 77.70                           |
| <b><i>G. aquatilis</i></b>             | 80.01              | 80.04           |                     | 77.97                   | 77.73                | 77.89                          | 77.11                           |
| <b><i>G. nectariphilus</i></b>         | 78.72              | 79.77           | 77.97               |                         | 82.82                | 77.74                          | 78.37                           |
| <b><i>G. megaterium</i></b>            | 77.51              | 77.74           | 77.73               | 82.82                   |                      | 77.36                          | 77.78                           |
| <b><i>Rhodobacter sphaeroides</i></b>  | 77.91              | 77.81           | 77.89               | 77.74                   | 77.36                |                                | 78.42                           |
| <b><i>Paracoccus denitrificans</i></b> | 77.67              | 77.70           | 77.11               | 78.37                   | 77.78                | 78.42                          |                                 |
